# Supplementary material
Source: PubMed Central journal article supplement (PMC3777251)
Supplement: NIHMS393094-supplement-supplement_1.pdf [file NIHMS393094-supplement-supplement_1.pdf]

## SUPPLEMENTAL TABLE 1

Comparison of pregnancy outcomes in patients who underwent embryo transfer (ET) based on the year of embryo freezing between the low-dose (LD) and high-dose (HD) FSH regimens.

| Year | No. of patients in LD group | No. of patients in HD group | Live birth rate, % (per ET) | Mean age, y $\pm$ SD |
|------|-----------------------------|-----------------------------|-----------------------------|----------------------|
| 2004 | 6                           | 0                           | 66.6% (4/6)                 | 38.8 $\pm$ 3.3       |
| 2005 | 6                           | 0                           | 33.3% (2/6)                 | 33.2 $\pm$ 4.2       |
| 2006 | 2                           | 2                           | 75.0% (3/4)                 | 32.8 $\pm$ 1.3       |
| 2007 | 1                           | 3                           | 25.0% (1/4)                 | 37.0 $\pm$ 2.7       |
| 2008 | 0                           | 3                           | 0% (0/3)                    | 33.0 $\pm$ 1.0       |
| 2009 | 0                           | 3                           | 33.3% (1/3)                 | 35.0 $\pm$ 6.6       |

Lee. FSH dose and fertility preservation. *Fertil Steril* 2012.
